# Supplementary material
Source: publisher figshare collection journal article supplement (https://sage.figshare.com/ndownloader/files/13047611)
Supplement: Supplementary file 1 [file 13047611]

The differences of cells derived from synovium between male and female.  
 Values are shown as mean  $\pm$  standard deviation.

|                                                 | male            | female          | P value |
|-------------------------------------------------|-----------------|-----------------|---------|
| <hr/>                                           |                 |                 |         |
| No.of colonies                                  |                 |                 |         |
| paralabral synovium                             | 7.1 $\pm$ 13.0  | 10.2 $\pm$ 17.7 | .96     |
| cotyloid fossa synovium                         | 27.5 $\pm$ 25.5 | 34.2 $\pm$ 23.4 | .34     |
| <hr/>                                           |                 |                 |         |
| No. of Nucleated cells ( $\times 10^5$ )/Colony |                 |                 |         |
| paralabral synovium                             | 2.2 $\pm$ 2.0   | 0.8 $\pm$ 1.0   | .21     |
| cotyloid fossa synovium                         | 2.2 $\pm$ 1.1   | 1.4 $\pm$ 0.6   | .10     |

The differences of cells derived from synovium about age.

|                                                 | r     | P value |
|-------------------------------------------------|-------|---------|
| <hr/>                                           |       |         |
| No.of colonies                                  |       |         |
| paralabrum synovium                             | .06   | .81     |
| cotyloid fossa synovium                         | - .54 | < .05   |
| <hr/>                                           |       |         |
| No. of Nucleated cells ( $\times 10^5$ )/Colony |       |         |
| paralabrum synovium                             | 0.16  | 0.53    |
| cotyloid fossa synovium                         | 0.09  | 0.75    |
